# Supplementary material for: Engineering supramolecular organic frameworks (SOFs) of C-alkylpyrogallol[4]arene with bipyridine-based spacers
Source: Royal Society of Chemistry journal article supplement (doi:10.1039/c4cc08388a), 2014-12-19
Supplement: c4cc08388a1.pdf [file c4cc08388a1.pdf]

Electronic supplementary information:

**Engineering Supramolecular Organic Frameworks (SOFs)  
of C-alkylPyrogallol[4]arene with Bipyridine-based Spacers**

*Rahul S. Patil, Harshita Kumari, Charles L. Barnes, and Jerry L. Atwood*

601 S. College Avenue, Department of Chemistry, University of Missouri, Columbia, MO, USA  
65211.

**Materials and methods:**

The XRD data was collected on a Bruker Apex II CCD diffractometer at a temperature of 100(2) K using CuK $\alpha$  radiation incotec Microfocus II (0.71073Å). The structure was solved and refined using SHELX with X-Seed as the interface. The general synthetic procedure of all frameworks is explained in more detail below, and the crystal structure details and CIF files are given in electronic supporting information.

Thermogravimetric analysis is carried out on TA(TGA Q50) instrument with the temperature ranging from 15°C to 350°C of the 2mg-4mg sample. <sup>1</sup>H NMR analysis is carried out on Bruker DRX 300 instrument with *d*6-DMSO as a deuterated solvent.

**General procedure of growing crystals:** In a 20 ml glass vial, 2ml of 0.005M solution of PgC in acetonitrile or acetonitrile/toluene (9:1) mixture was mixed with 2ml of 0.01M solution (in acetonitrile) of spacer molecule. The clear mixture was then sonicated for 5 min and allowed to stand for slow solvent evaporation. Crystals suitable for scXRD were obtained over 8-10 days. Similar procedures were followed to grow the crystals for all the frameworks described in the article.

### Crystallographic data of frameworks:

|                    | <b>1a</b>                                                         | <b>1b</b>                                                         | <b>2a</b>                                                       | <b>2b</b>                                                         |
|--------------------|-------------------------------------------------------------------|-------------------------------------------------------------------|-----------------------------------------------------------------|-------------------------------------------------------------------|
| Molecular formula  | C <sub>124</sub> H <sub>134</sub> N <sub>10</sub> O <sub>24</sub> | C <sub>146</sub> H <sub>150</sub> N <sub>10</sub> O <sub>24</sub> | C <sub>79</sub> H <sub>64</sub> N <sub>10</sub> O <sub>12</sub> | C <sub>168</sub> H <sub>128</sub> N <sub>20</sub> O <sub>24</sub> |
| Formula weight     | 2148.48                                                           | 2428.85                                                           | 1345.44                                                         | 2810.99                                                           |
| Crystal system     | Monoclinic                                                        | Orthorhombic                                                      | Tetragonal                                                      | Monoclinic                                                        |
| Space group        | P21/c                                                             | Pna21                                                             | P4/ncc                                                          | C2/c                                                              |
| Temp.(K)           | 100                                                               | 100                                                               | 100                                                             | 100                                                               |
| a(Å)               | 21.1314                                                           | 23.4514                                                           | 21.6686                                                         | 20.8301                                                           |
| b(Å)               | 15.228                                                            | 16.4326                                                           | 21.6686                                                         | 12.6507                                                           |
| c(Å)               | 18.2707                                                           | 16.8992                                                           | 15.3857                                                         | 29.0453                                                           |
| α(°)               | 90                                                                | 90                                                                | 90                                                              | 90                                                                |
| β(°)               | 110.133                                                           | 90                                                                | 90                                                              | 107.33                                                            |
| γ(°)               | 90                                                                | 90                                                                | 90                                                              | 90                                                                |
| V(Å <sup>3</sup> ) | 5517.04                                                           | 6512.40                                                           | 7424.02                                                         | 7306.35                                                           |
| Z                  | 2                                                                 | 2                                                                 | 4                                                               | 2                                                                 |

### PXRD: Overlay of experimental and calculated PXRD for sample **1b**

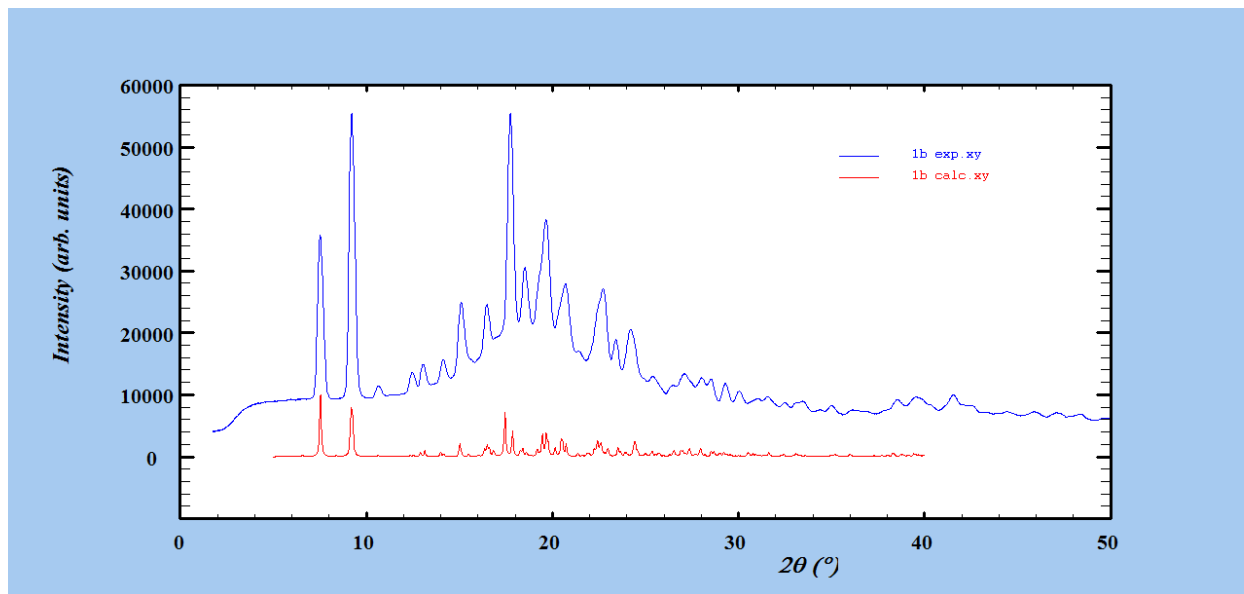

## Thermogravimetric Analysis (TGA) Graphs:

1. 1

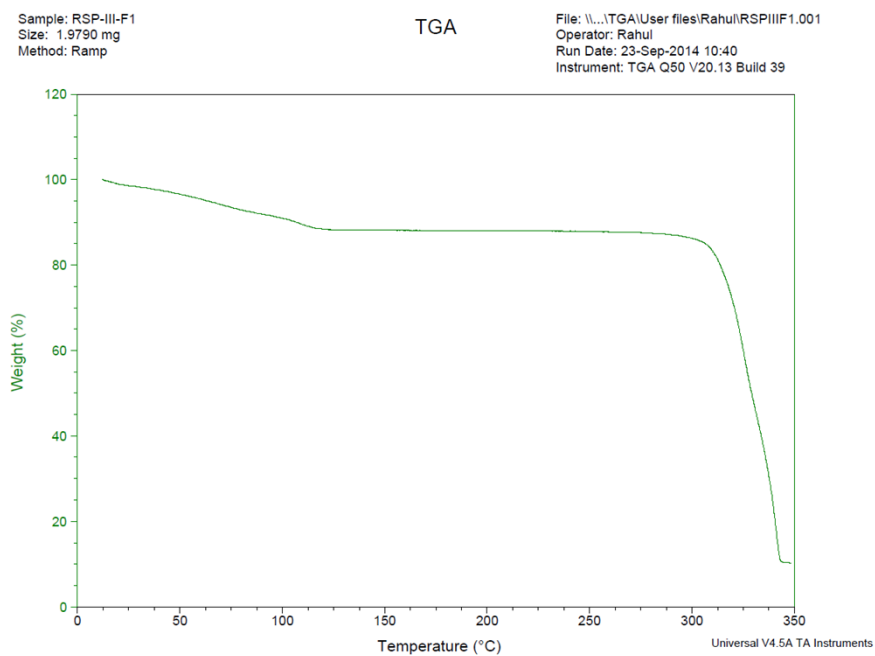

2. 1a

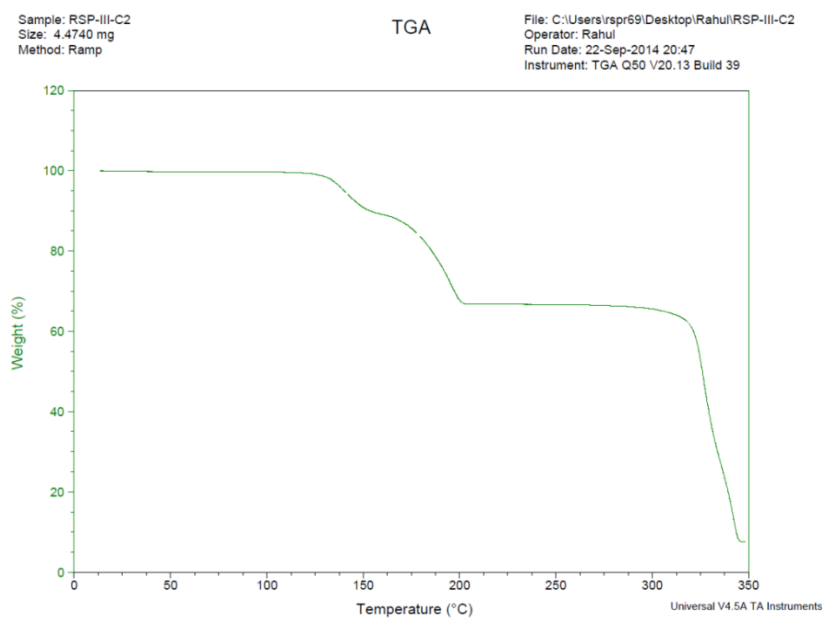

### 3.1b

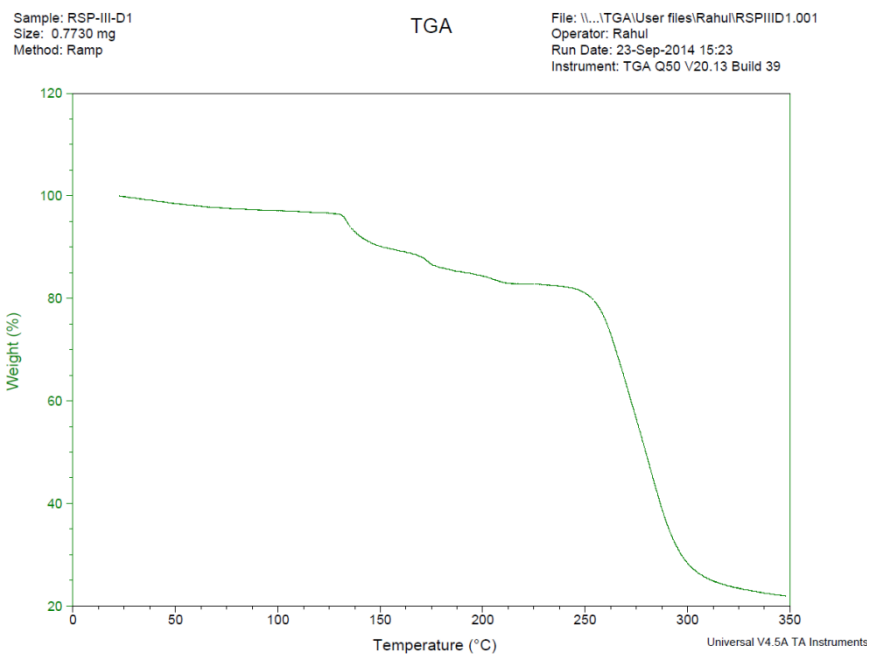

### 4. 2

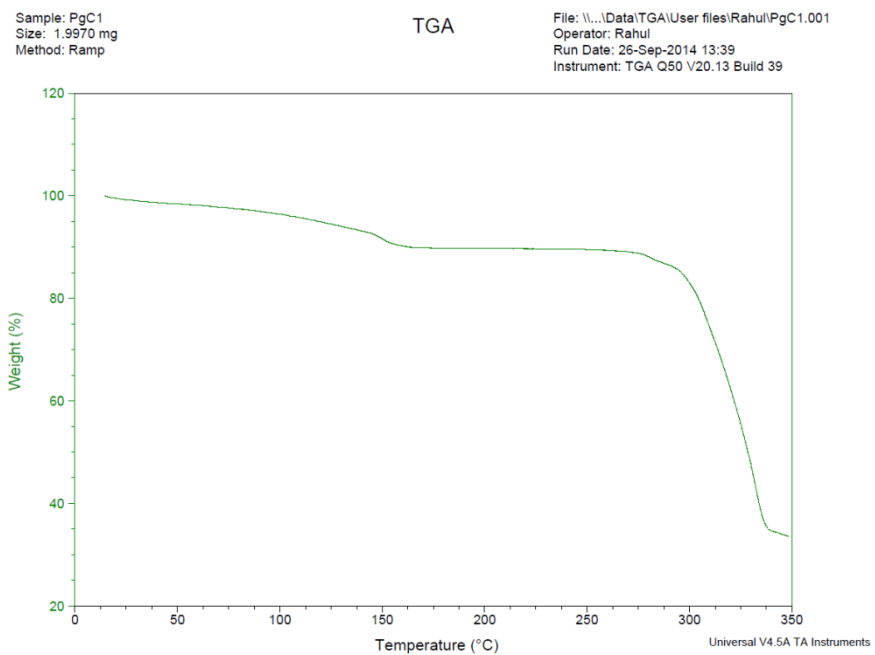

## 5. 2a

Sample: Form A to Form C  
Size: 3.6360 mg  
Method: Ramp

TGA

File: C:\Users\rspr69\Desktop\Rahul\Data.001  
Operator: Rahul  
Run Date: 22-Sep-2014 16:42  
Instrument: TGA Q50 V20.13 Build 39

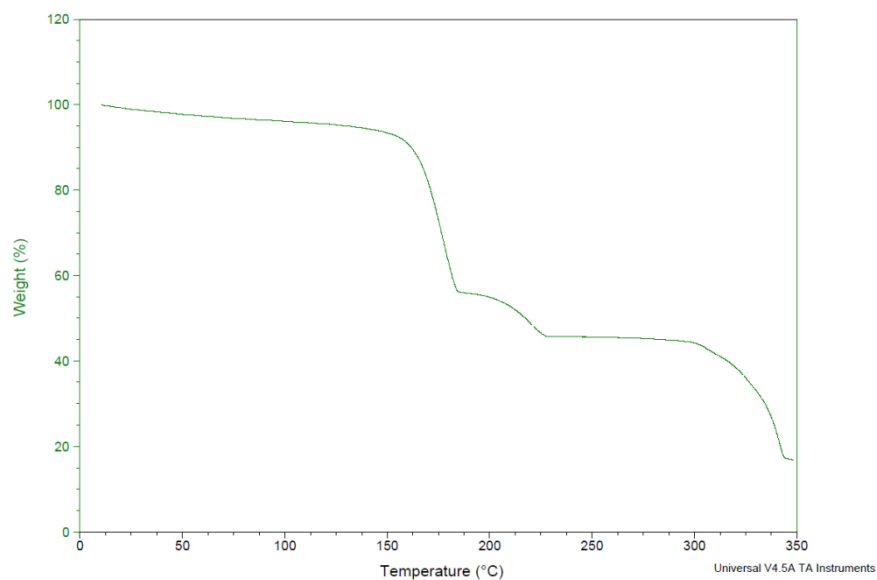

## 6. 2b

Sample: RSP-III-B1  
Size: 2.2160 mg  
Method: Ramp

TGA

File: \\...TGA\User files\Rahul\RSP\III-B1.001  
Operator: Rahul  
Run Date: 23-Sep-2014 13:31  
Instrument: TGA Q50 V20.13 Build 39

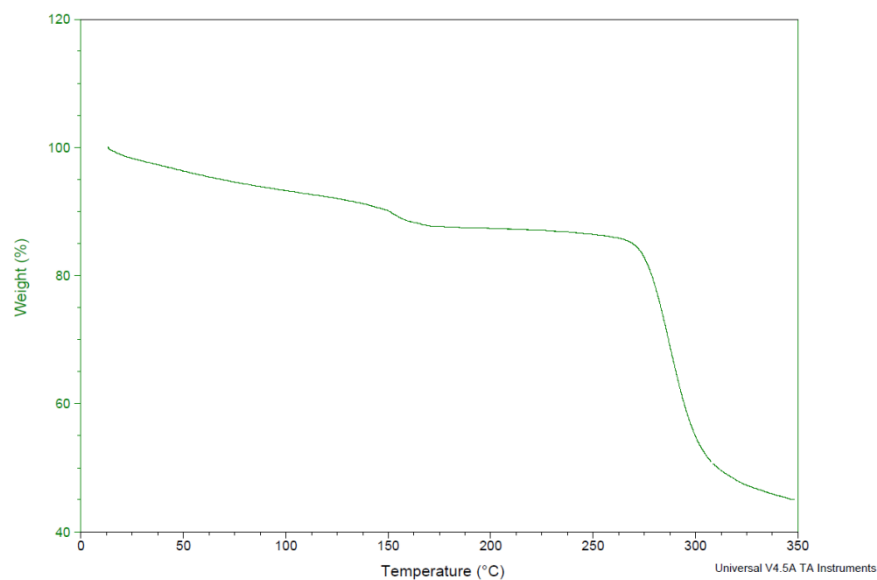

<sup>1</sup>H NMR spectra:

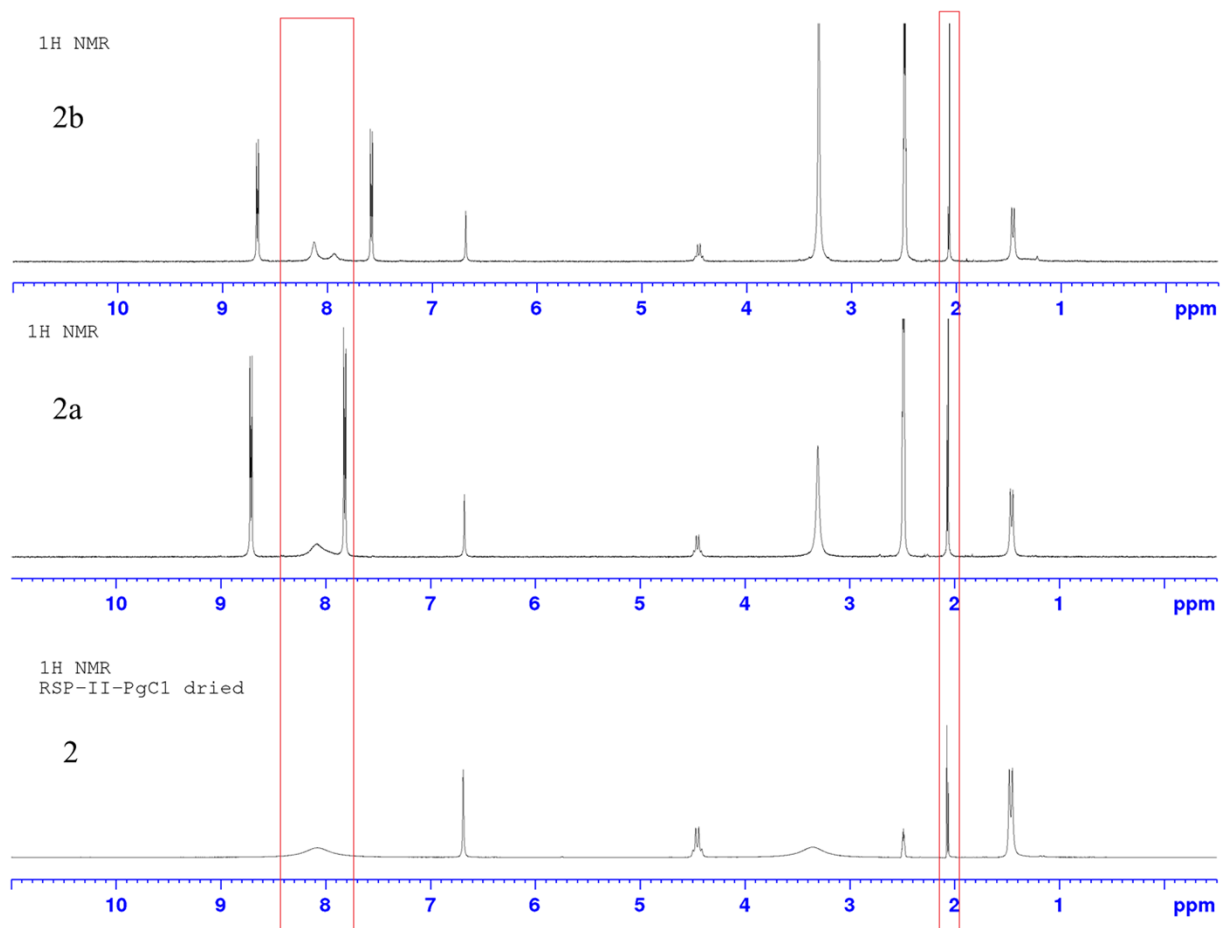

Table 1: Validation of weight loss in TGA with <sup>1</sup>H NMR data.

|                                         | 1a     | 1b                    | 2a       | 2b                |
|-----------------------------------------|--------|-----------------------|----------|-------------------|
| Calculated solvent molecules/macrocycle | 1 MeCN | 1.5 MeCN, 0.7 Toluene | 3.6 MeCN | 2.3 MeCN, 2 water |
| % mass of solvent                       | 4      | 9.6                   | 11       | 12                |
| %weight loss                            | 5      | 10                    | 10       | 10                |
| Temperature                             | 120 °C | 150 °C                | 160 °C   | 150 °C            |

$^1\text{H}$  NMR spectra with integration:

1.

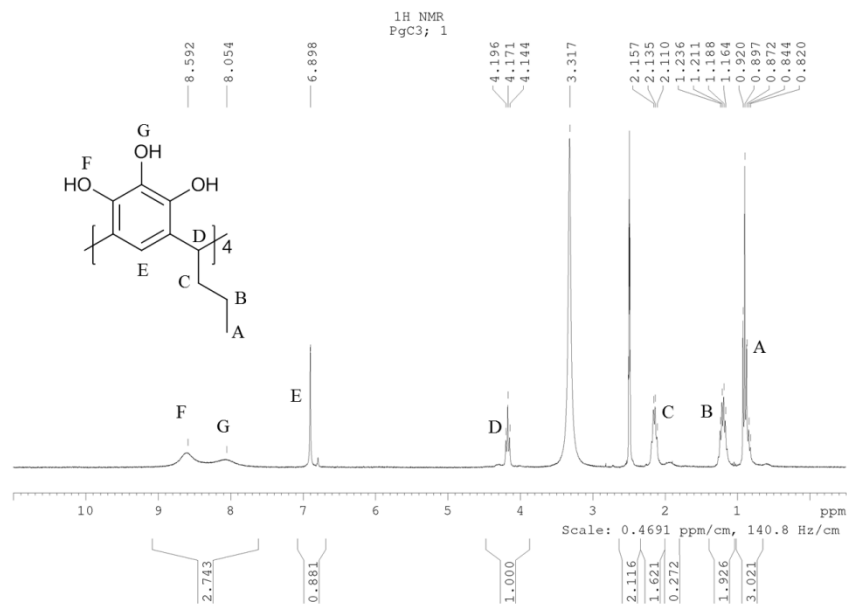

1a.

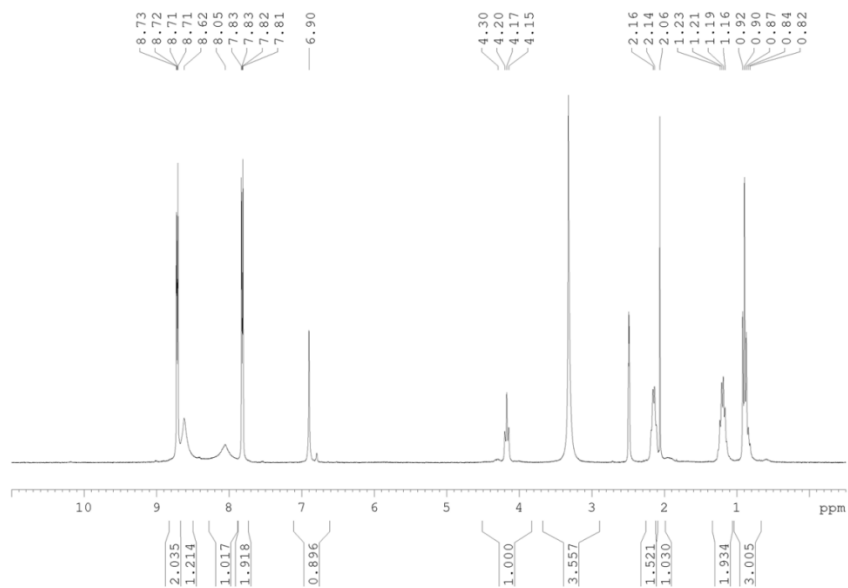

1b.

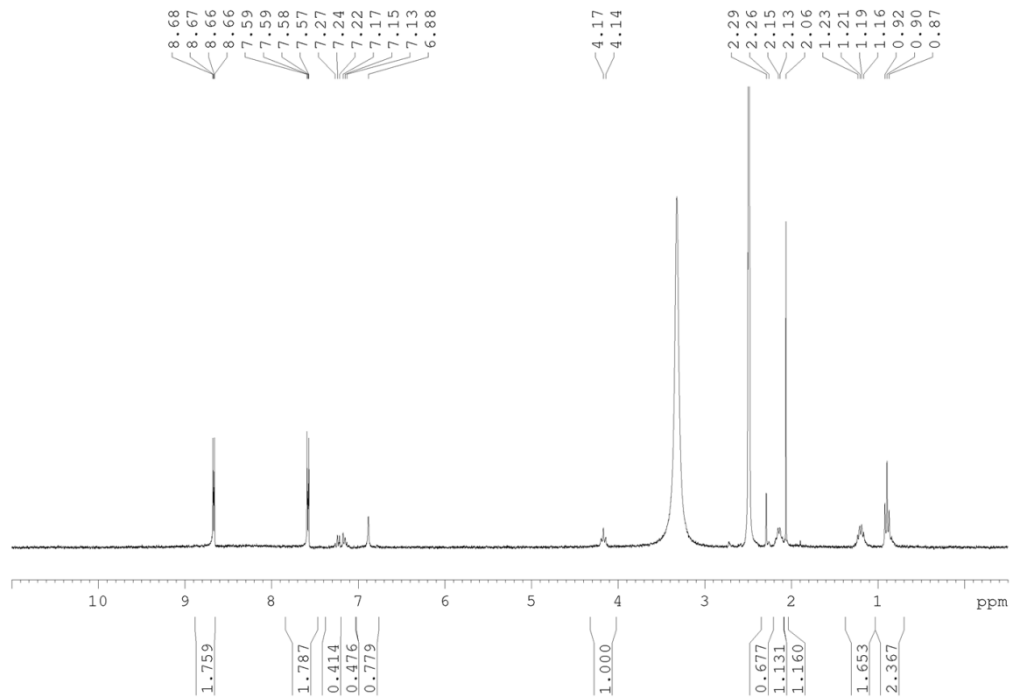

2.

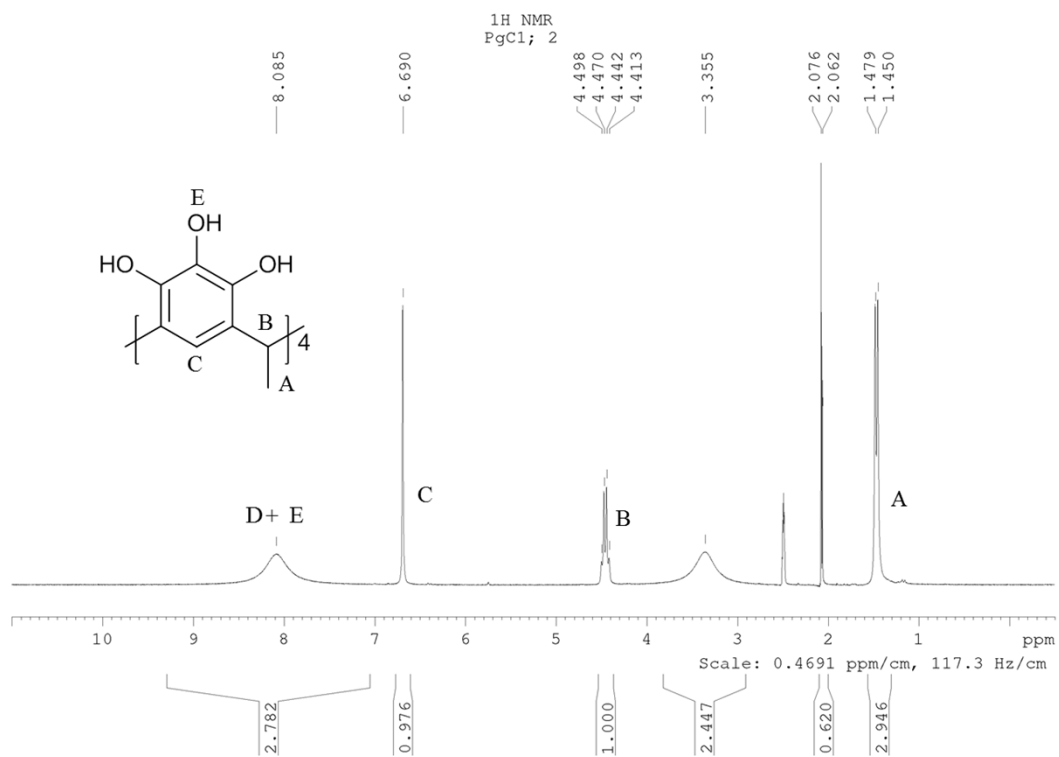



2a.

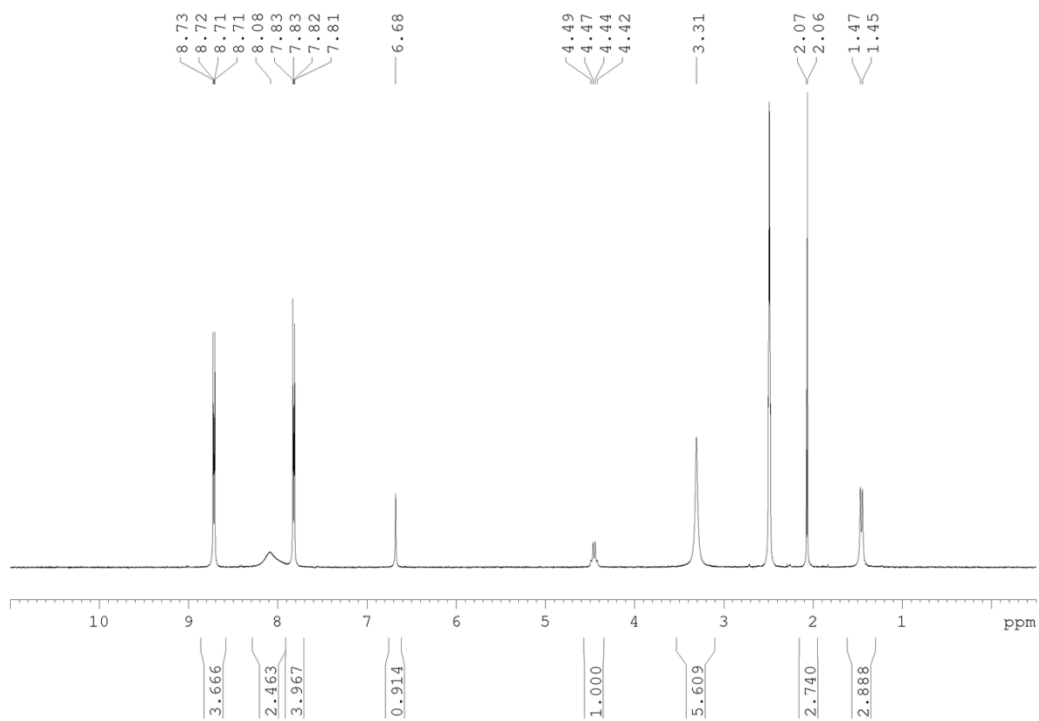

2b.

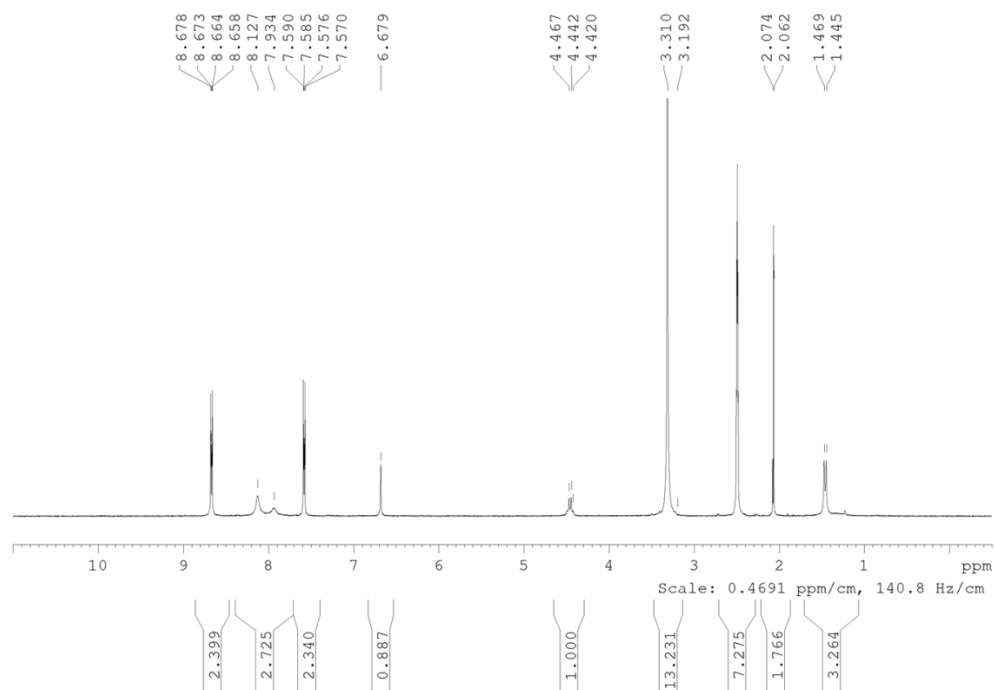

1: C-methylpyrogallol[4]arene, PgC1

**2:** *C*-propylpyrogallol[4]arene, PgC3

**1a:** [(PgC3).(bpy).(MeCN)]

**1b:** [(PgC3).(bpa).(MeCN.Toluene)]

**2a:** [(PgC1).(bpy).(MeCN)]

**2b:** [(PgC1).(bpa).(MeCN)]
